# Supplementary material
Source: PubMed Central journal article supplement (PMC7105950)
Supplement: jamaneurol-77-725-s003.pdf [file jamaneurol-77-725-s003.pdf]

# Data Sharing Statement

Pico. Effect of In-Hospital Remote Ischemic Perconditioning on Brain Infarction Growth and Clinical Outcomes in Patients With Acute Ischemic Stroke. *JAMA Neurol*. Published March 30, 2020. 10.1001/jamaneurol.2020.0326

## Data

**Data available:** Yes

**Data types:** Deidentified participant data

**How to access data:** De-identified participant data will be made available from the corresponding author on request. fpico@ch-versailles.fr

**When available:** With publication

## Supporting Documents

**Document types:** Statistical/analytic code

**How to access documents:** fpico@ch-versailles.fr

**When available:** With publication

## Additional Information

**Who can access the data:** Written proposals will be assessed by members of the RESCUE BRAIN steering committee and a decision made about the appropriateness of the use of data. A data sharing agreement will be put in place before any data are shared

**Types of analyses:** Written proposals will be assessed by members of the RESCUE BRAIN steering committee and a decision made about the appropriateness of the use of data. A data sharing agreement will be put in place before any data are shared

**Mechanisms of data availability:** Written proposals will be assessed by members of the RESCUE BRAIN steering committee and a decision made about the appropriateness of the use of data. A data sharing agreement will be put in place before any data are shared
